# Supplementary material for: Role of Folic Acid in the Therapeutic Action of Nanostructured Porous Silica Functionalized with Organotin(IV) Compounds against Different Cancer Cell Lines
Source: MDPI journal article supplement (doi:10.3390/pharmaceutics12060512), 2020-06-03
Supplement: s1 [file s1]

# Supplementary Materials: Role of Folic Acid in the Therapeutic Action of Nanostructured Porous Silica Functionalized with Organotin(IV) Compounds Against Different Cancer Cell Lines

Diana Díaz-García, Karla Montalbán-Hernández, Irene Mena-Palomo, Patriciu Achimas-Cadariu, Antonio Rodríguez-Diéguez, Eduardo López-Collazo, Sanjiv Prashar, Karina Ovejero Paredes, Marco Filice, Eva Fischer-Fodor and Santiago Gómez-Ruiz

## TABLE OF CONTENTS OF SUPPLEMENTARY MATERIAL

This supplementary material contains:

- 1) FT-IR spectra of MSN. MSU-2, MSN-AP, MSU-2-AP, MSN-AP-FA and MSU-2-AP-FA (Figure S1A-F)
- 2) TG and DSC analysis of MSN. MSU-2, MSN-AP, MSU-2-AP, MSN-AP-FA, MSU-2-AP-FA, MSN-AP-FA-Sn and MSU-2-AP-FA-Sn. (Figures S2-S9 respectively)
- 3) Z-potential measurements (Figure S10)
- 4) Curves dose-response (Figure S11)
- 5) Concentration of FOLR1 secreted by tumour cells subjected to treatment (Figure S12)

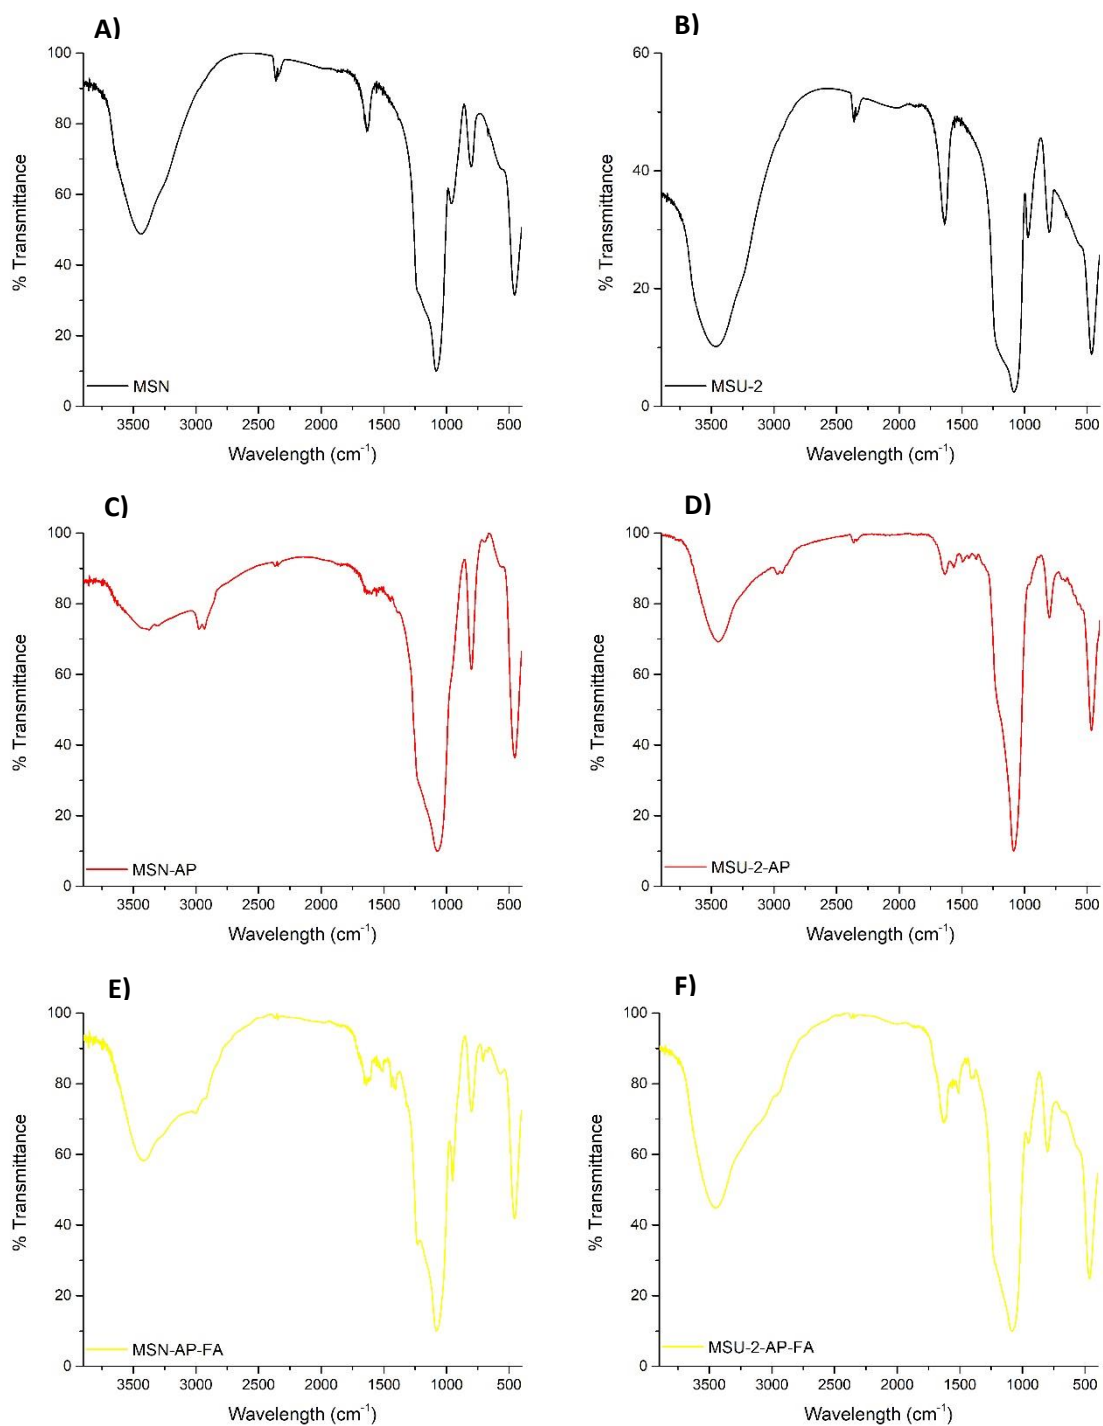

**Figure S1.** FT-IR spectra of the starting silica materials (A and B), functionalized with AP (C and D) and after the FA incorporation (E and F).

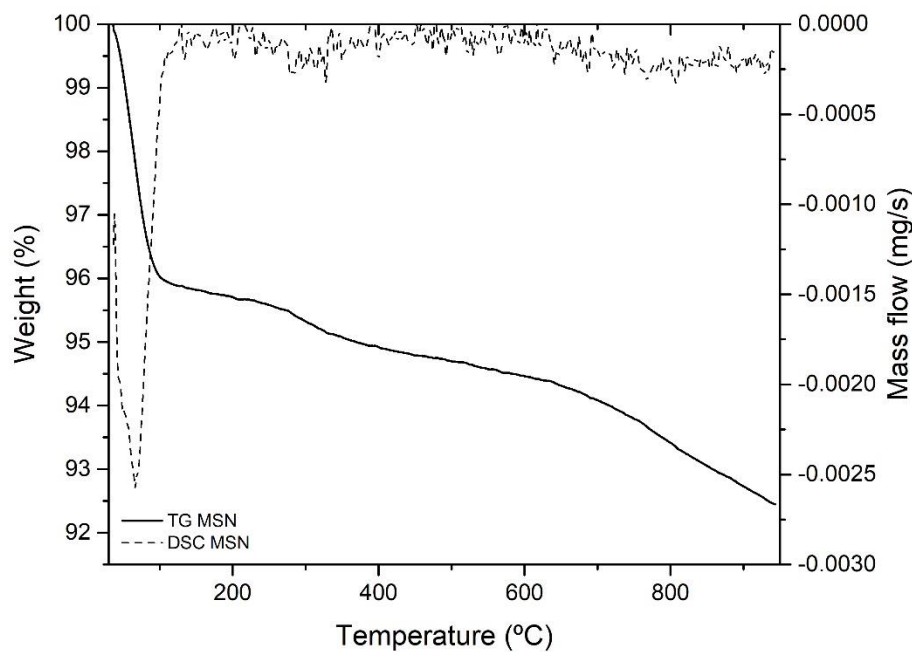

**Figure S2.** TG-DSC of the starting material MSN.

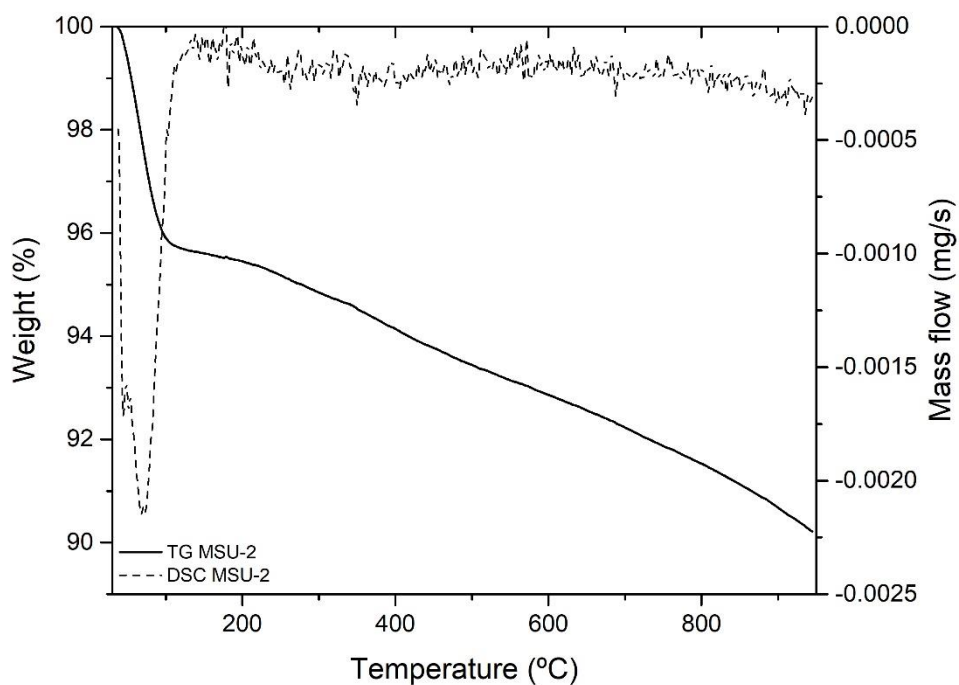

**Figure S3.** TG-DSC of the starting material MSU-2.

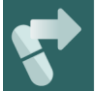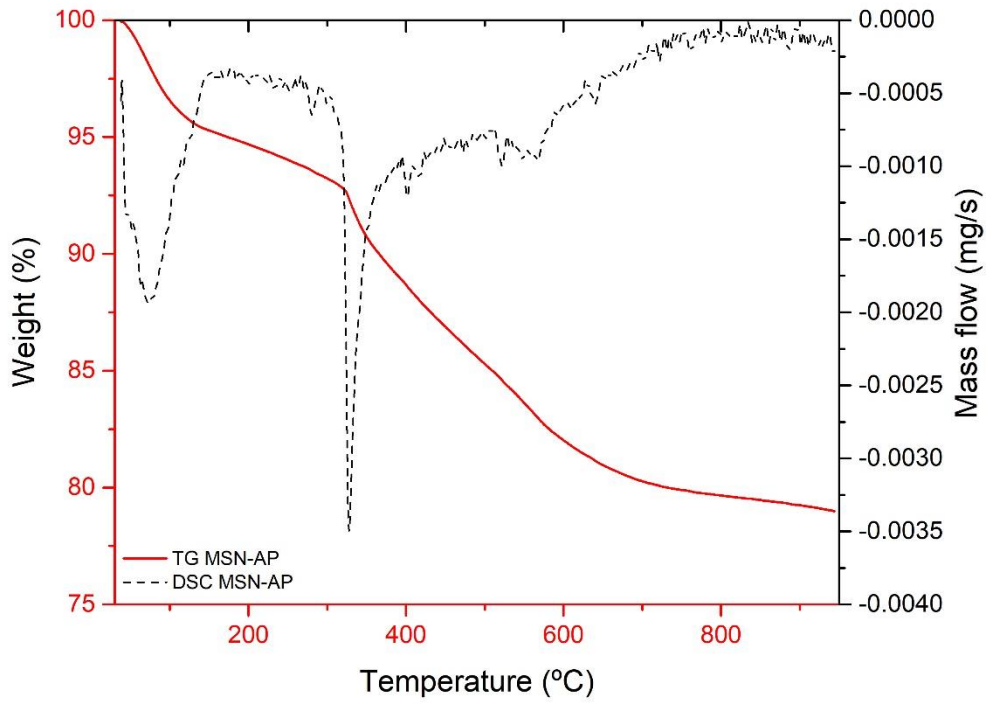

Figure S4. TG-DSC of MSN-AP.

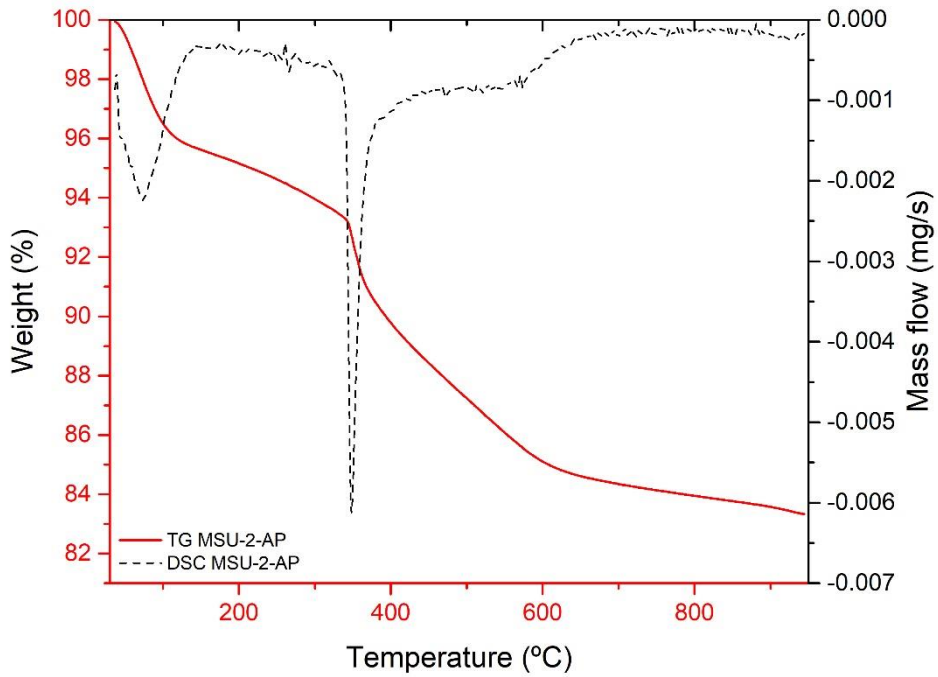

Figure S5. TG-DSC of MSU-2-AP.

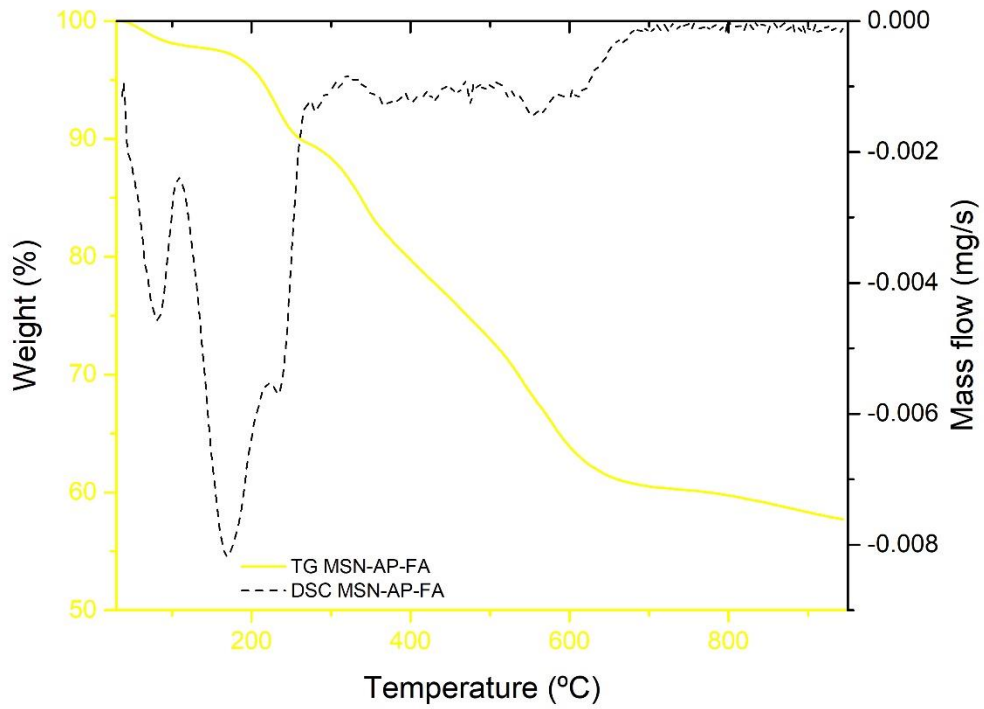

Figure S6. TG-DSC of MSN-AP-FA.

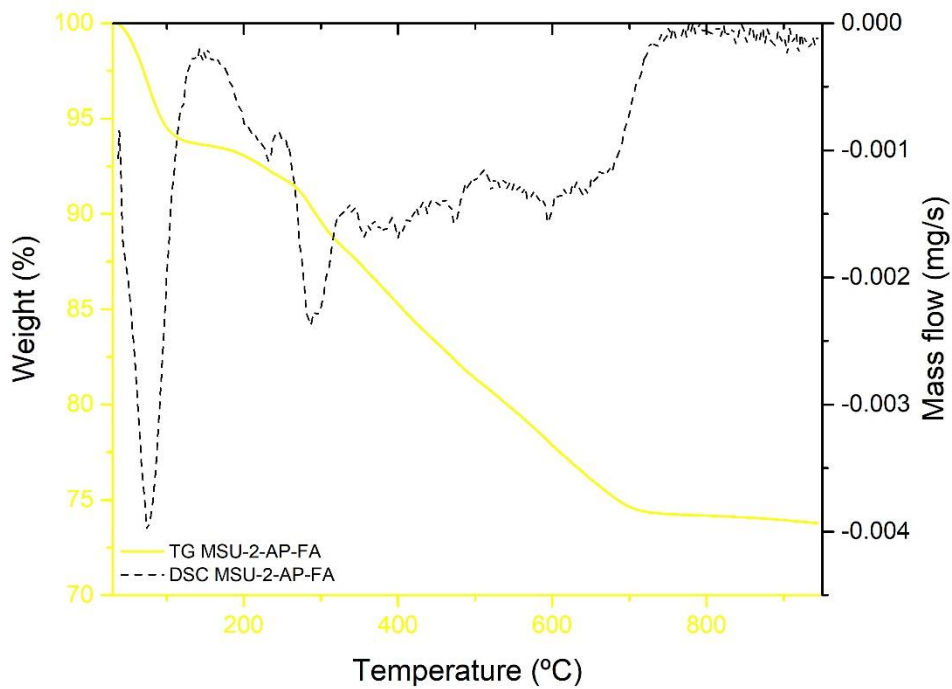

Figure S7. TG-DSC of MSU-2-AP-FA.

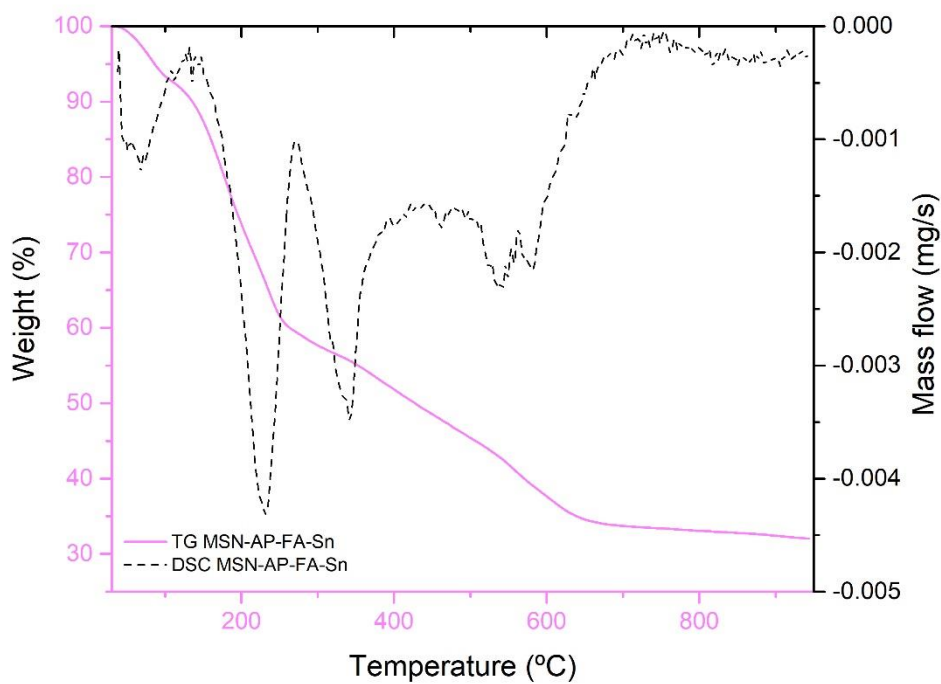

**Figure S8.** TG-DSC of MSN-AP-FA-Sn.

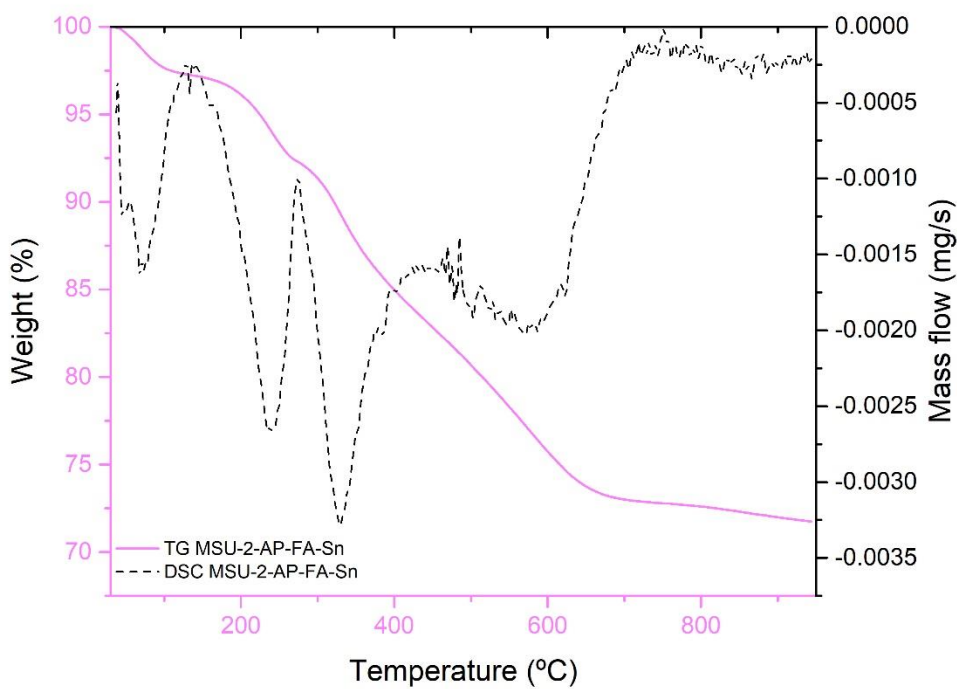

**Figure S9.** TG-DSC of MSU-2-AP-FA-Sn.

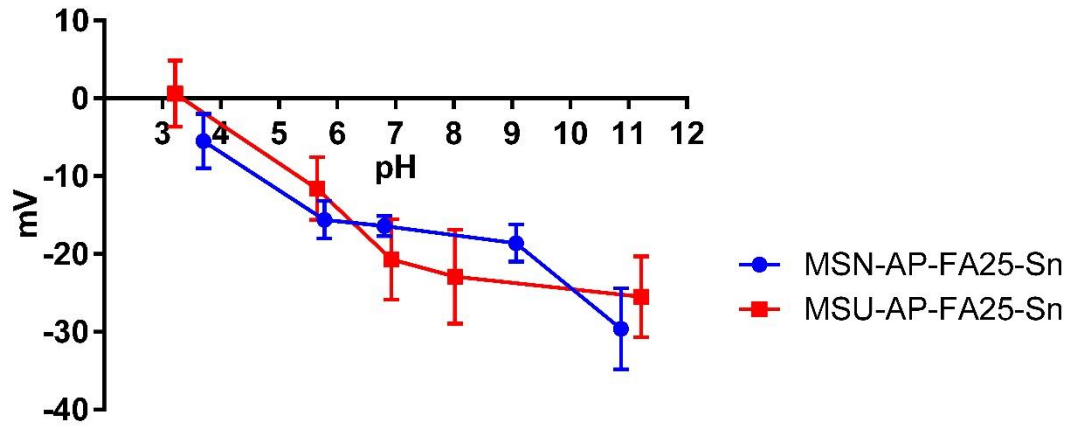

Figure S10. Z-potential measurements between pH 3 and pH 12 for MSN-AP-FA25-Sn and MSU-2-AP-FA25-Sn

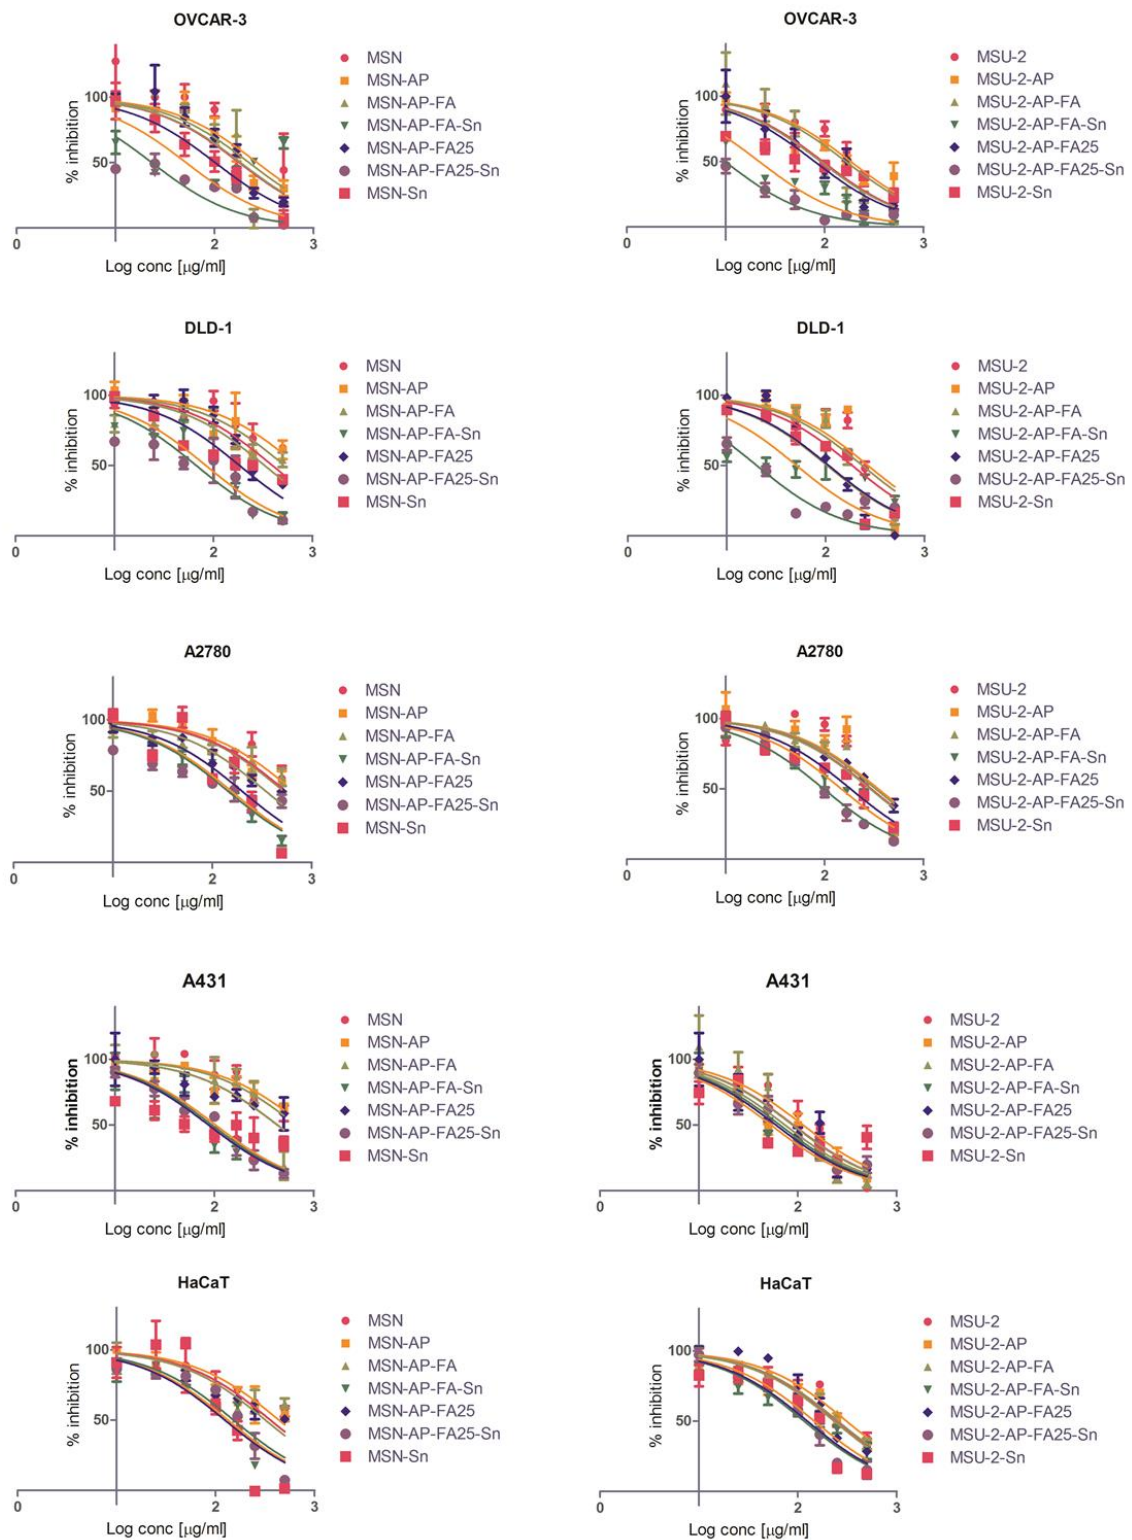

**Figure S11.** Nonlinear dose-response relationship between the concentration *vs* the cell growth inhibition following the 24-hours treatment with MSU-2 and MSN materials *in vitro*.



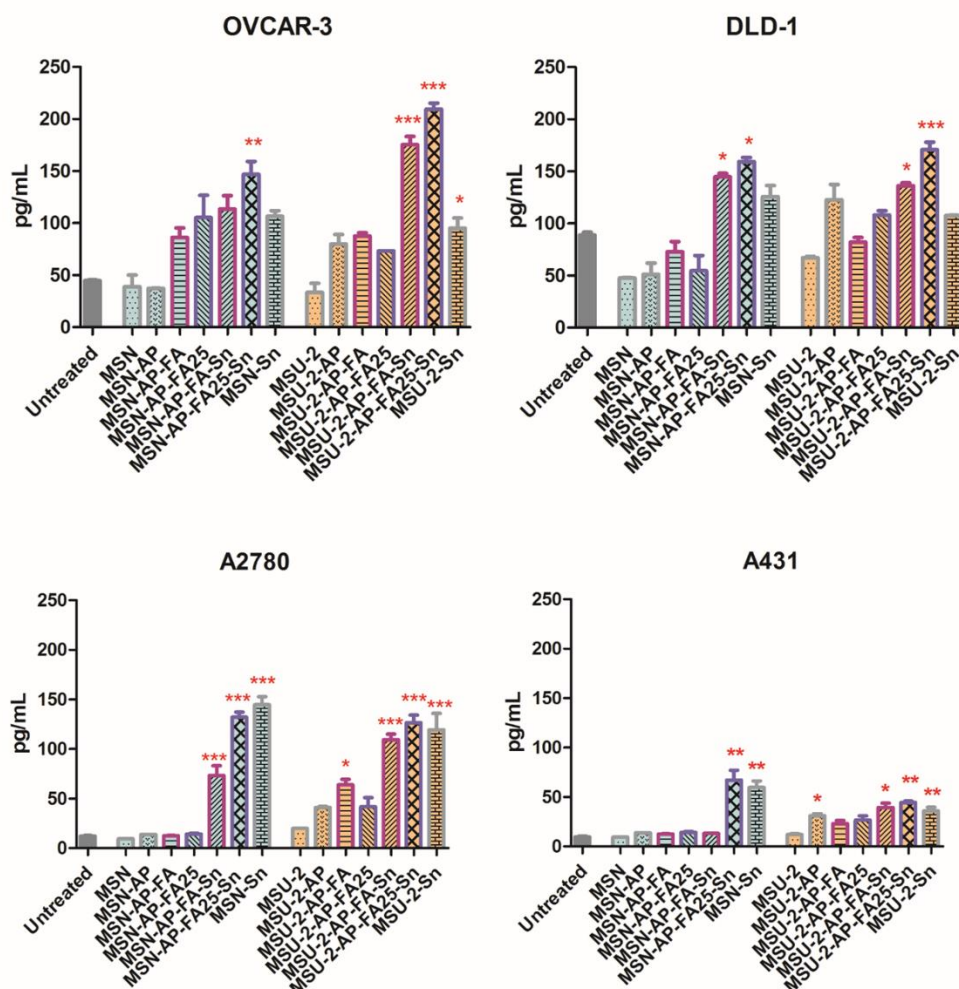

**Figure S12.** Concentration of FOLR1 secreted by tumour cells subjected to treatment with mesoporous compounds. In the upper row the folate receptor-positive DLD-1 and OVCAR-3 cells, in the lower row are the A2780 and A431 cells, with low folate receptor expression. The statistically significant changes in FOLR1 level *vs* the untreated reference are evidenced by starring: \* represents  $p < 0.05$ , \*\*  $p < 0.01$  while \*\*\*  $p < 0.001$ . The columns with magenta border represents the materials functionalized with 10%FA, the blue border represents the materials functionalized with 25% FA.
